# Supplementary material
Source: PubMed Central journal article supplement (PMC2865135)
Supplement: NIHMS192119-supplement-Supp_Fig.pdf [file NIHMS192119-supplement-Supp_Fig.pdf]

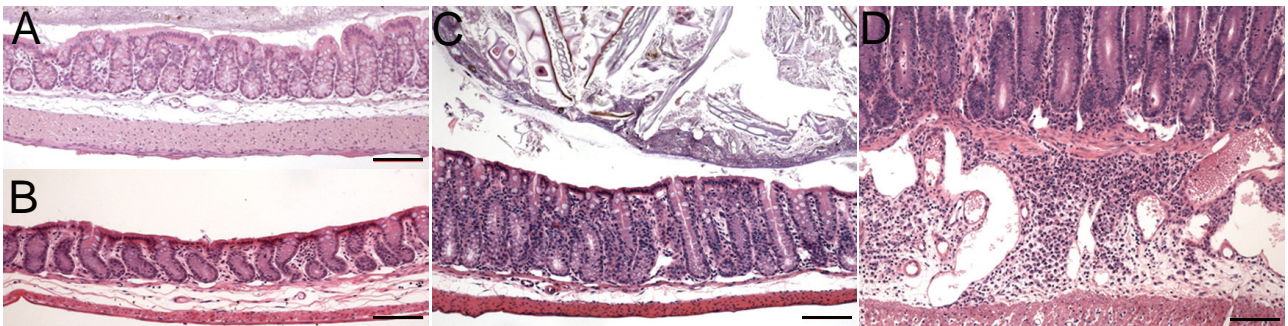

**Supplementary Figure S1. Hematoxylin and eosin staining of colon sections from wild-type and *Il10*<sup>-/-</sup> mice.** 7-week-old C57BL/6J wild-type mice (A) and 11-week-old C3Bir wild-type mice (B) did not show any signs of inflammation or lymphatic vessel changes. Colons of 6-week-old B6-*Il10*<sup>-/-</sup> mice (C) resembled that of wild-type mice whereas colons of 7-week-old C3Bir-*Il10*<sup>-/-</sup> mice (D) had severe tissue inflammation and enlarged vessels. Scale bars: 100 μm.

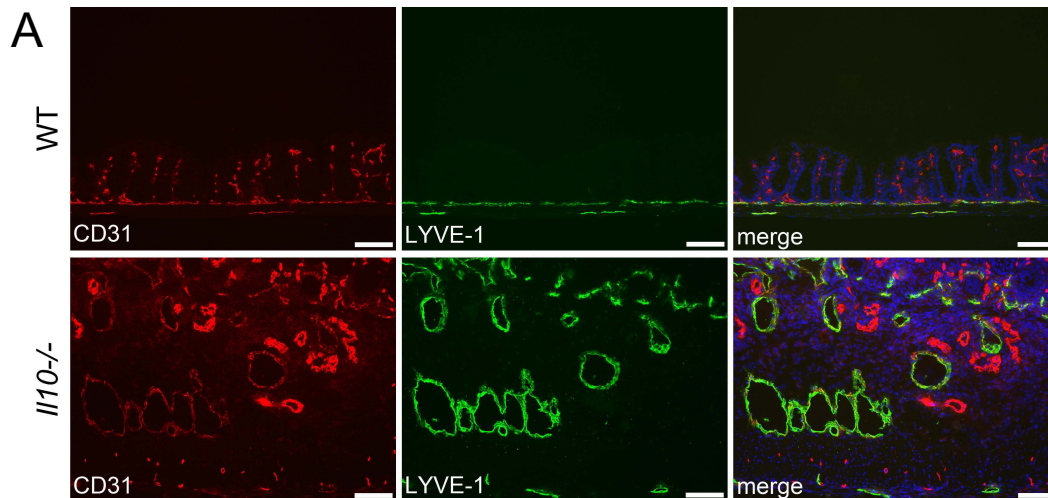

**B** Vasculature inflammatory changes in colon

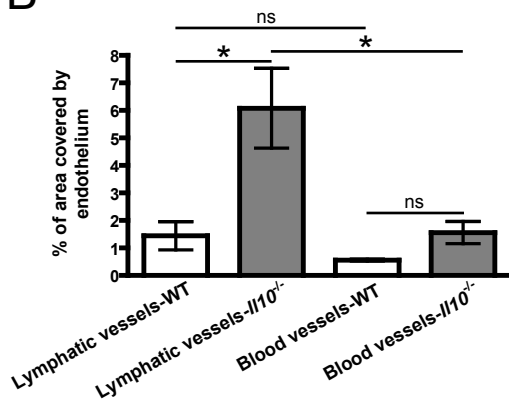

**Supplementary Figure S2. Inflammatory lymphatic vessel changes are more pronounced than inflammatory blood vessel changes in *Il10*<sup>-/-</sup> mouse colon.** (A) Representative images of 8-weeks-old wild-type mouse healthy colon tissue and 8-weeks-old *Il10*<sup>-/-</sup> mouse inflamed colon tissue sections immunostained for LYVE1 (green) and CD31 (red). Scale bars: 100  $\mu$ m, blue stain: Hoechst. (B) Percentage of areas covered by blood vessel endothelium (CD31<sup>high</sup>LYVE1<sup>-</sup>) and lymphatic vessel endothelium (CD31<sup>low</sup>LYVE1<sup>+</sup>) were calculated. t-test \* $p \leq 0.05$  (N per group=3).

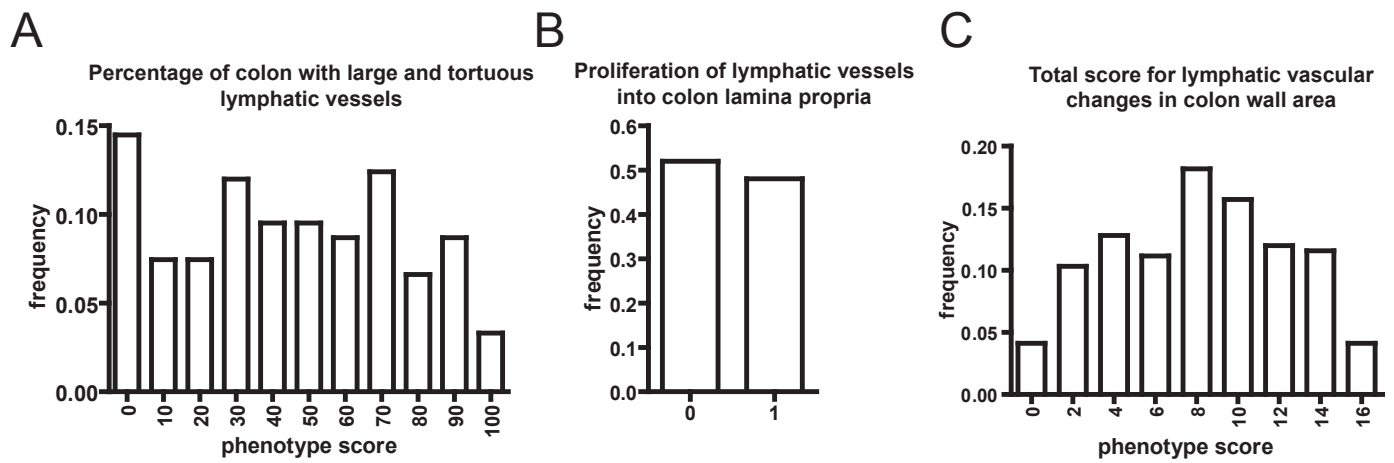

**Supplementary Figure S3. Lymphatic vessel traits are approximately normally distributed in F2 *Il10*<sup>-/-</sup> mice.** The analysis was performed considering a normal distribution of all F2 traits, except for the ingrowth of lymphatic vessels into lamina propria (B), which was treated as a binary trait. x-axis: phenotype score, y-axis: percentage of F2 mice with the given phenotype score.

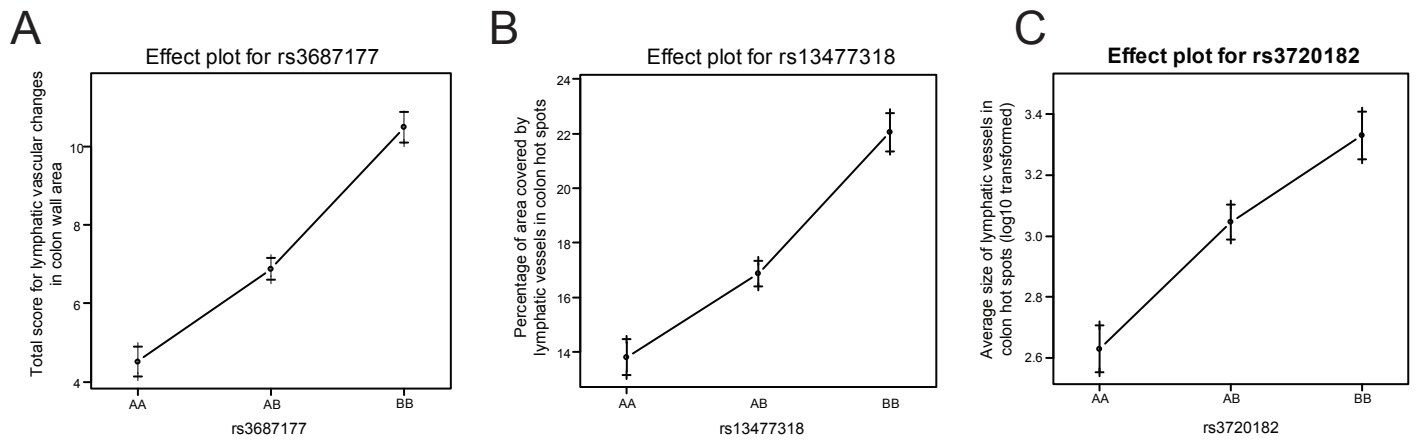

**Supplementary Figure S4. Three peak markers with the highest effects on lymphatic vessel inflammatory changes.** F2 mice with double C3Bir allele at markers rs3687177 (A), rs13477318 (B) and rs3720182 (C) display the most severe lymphatic vessel subphenotypes. (y-axis: phenotype score, error bars: F2 group variance).

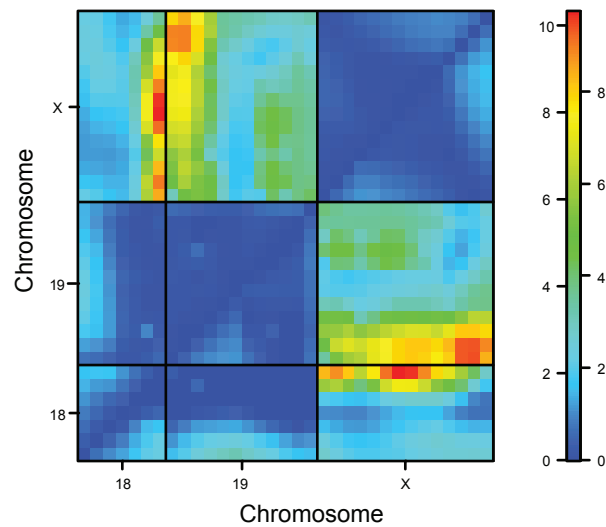

**Supplementary Figure S5. Significant interaction is observed between loci on Chromosomes 18, 19 and X.** Enlarged view of the two-dimensional genome scan performed with 243 F2 mice and 110 microsatellite markers for the trait: total lymphatic vessel score for non-mucosal intestinal wall area, for the Chromosome pairs X:19 and X:18. The upper left triangle contains the interaction model LOD scores, and the lower right triangle contains the conditional-interactive model LOD scores. Individual colored squares represent markers at the chromosomes indicating the hot spots of interaction. The color bar indicates the LOD scores for the left and right triangles respectively.

Pairwise correlation coefficients of the lymphatic vessel traits and mucosal inflammation traits

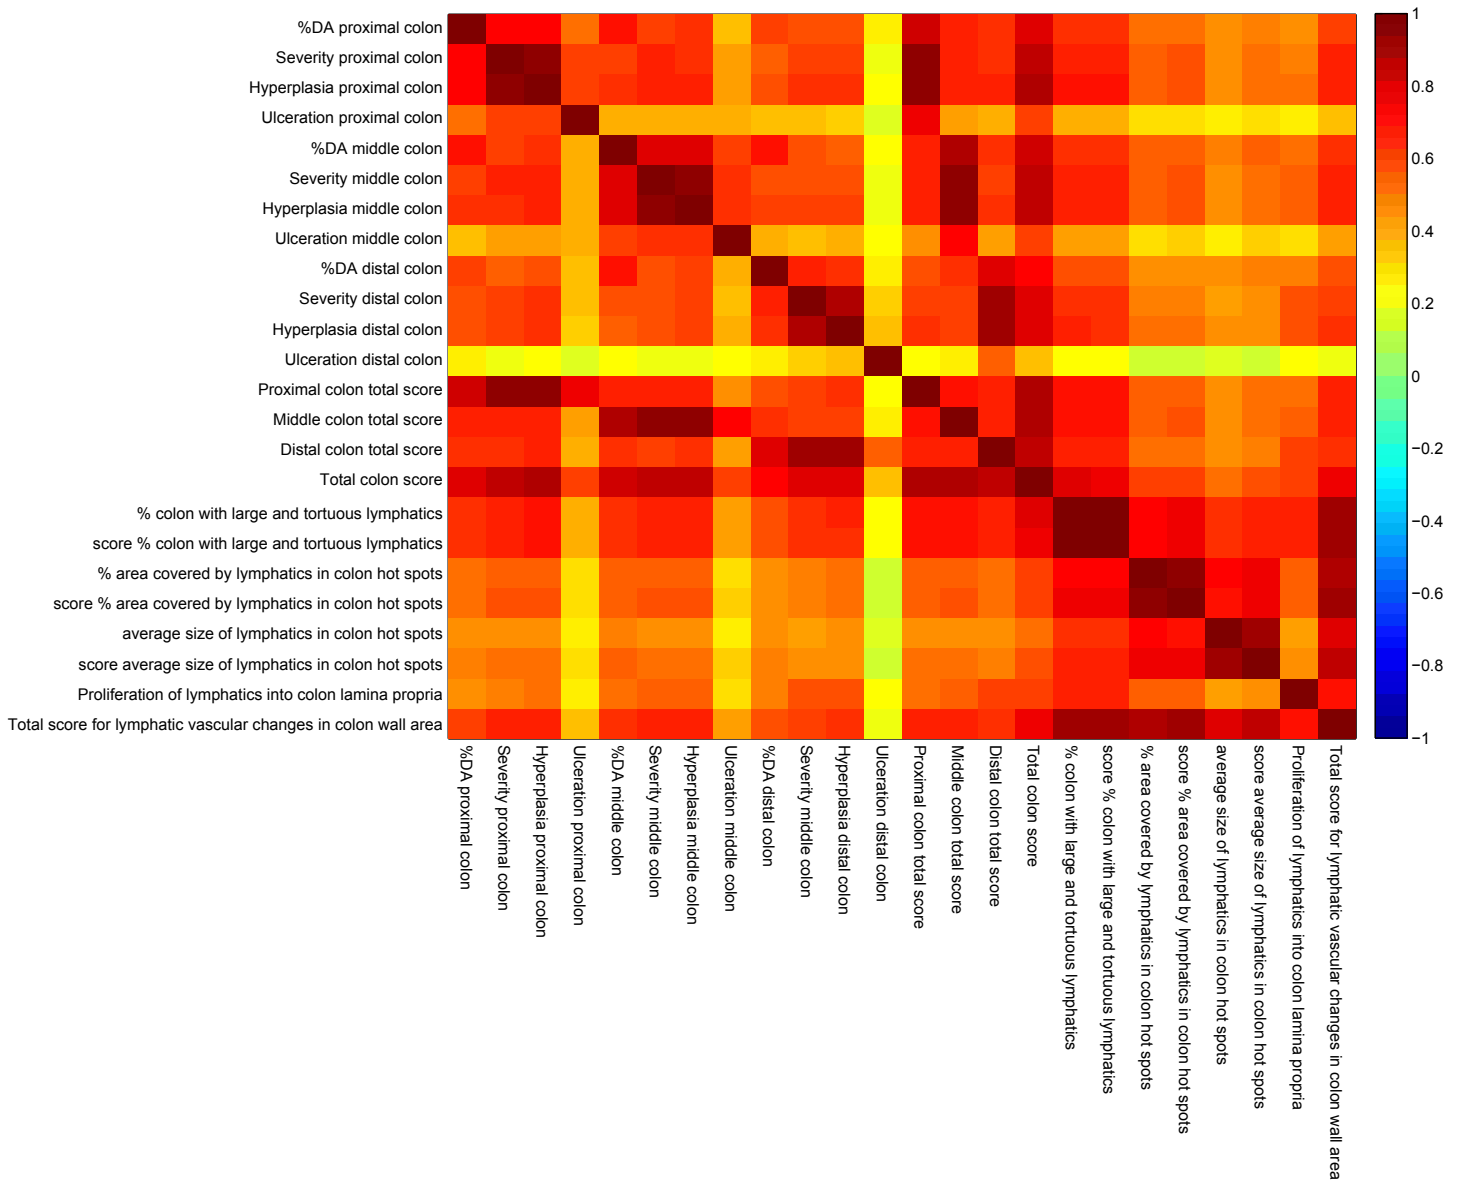

**Supplementary Figure S6. The lymphatic vessel traits correlate highly with the mucosal inflammation traits in colitis in *Il10*<sup>-/-</sup> F2 mice.** Matrix visualization for the Pearson pairwise correlation of the lymphatic vessel traits and colitis traits (n= 389 F2 mice). Pearson's correlation coefficients ( $r$ ) were converted into color codes explained by the color bar on the right.

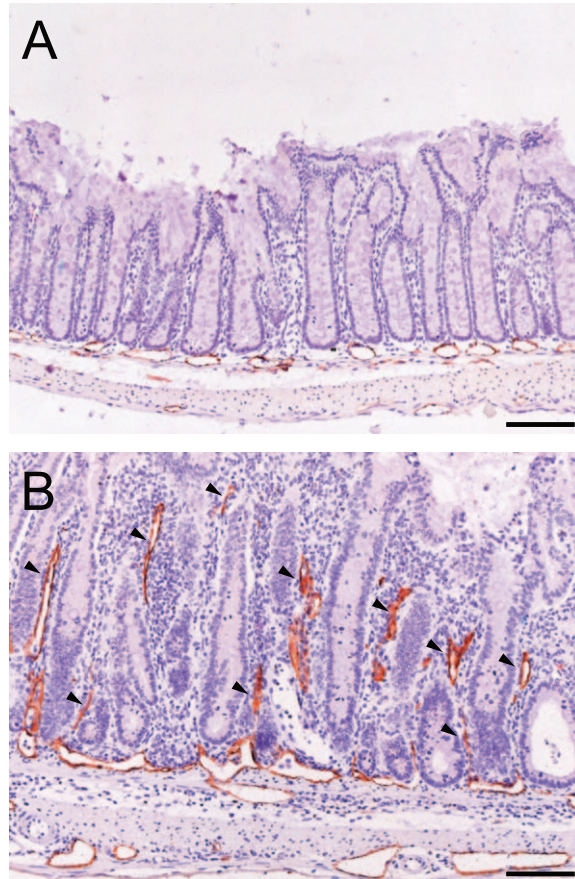

**Supplementary Figure S7. Lymphatic vessels invade the colon lamina propria in inflamed tissue.** Ingrowth of lymphatic vessels into the lamina propria between the colon epithelial crypts was observed only in inflamed colon. Representative images of normal colon (A) and inflamed colon (B) sections from *Il10*<sup>-/-</sup> mice, stained for LYVE1 (red), are shown. Arrowheads indicate lymphatic vessels that have grown into the lamina propria. Scale bars: 100  $\mu$ m.

**Supplementary table S1. Scoring system for the lymphatic vessel changes in colitis.**

**Percentage of whole colon with large and tortuous lymphatic vessels**

| <b>Measurement method</b> | <b>Visual inspection (blinded toward the mouse ID) of paraffin sections stained for LYVE1</b> |
|---------------------------|-----------------------------------------------------------------------------------------------|
| score 0                   | 0%                                                                                            |
| score 1                   | 1-20%                                                                                         |
| score 2                   | 21-40%                                                                                        |
| score 3                   | 41-60%                                                                                        |
| score 4                   | 61-80%                                                                                        |
| score 5                   | 81-100%                                                                                       |

**Percentage of area covered by lymphatic vessels in colon hot spots (3 hot spots chosen per case)**

| <b>Measurement method</b> | <b>IP-LAB software image analysis</b> |
|---------------------------|---------------------------------------|
| score 0                   | 2.5-10%                               |
| score 1                   | 11-15%                                |
| score 2                   | 16-20%                                |
| score 3                   | 21-25%                                |
| score 4                   | 26-30%                                |
| score 5                   | >30%                                  |

**Average size of lymphatic vessels in colon hot spots (3 hot spots chosen per case)**

| <b>Measurement method</b> | <b>IP-LAB software image analysis</b> |
|---------------------------|---------------------------------------|
| score 0                   | <500 $\mu\text{m}^2$                  |
| score 1                   | 500-1500 $\mu\text{m}^2$              |
| score 2                   | 1501-2500 $\mu\text{m}^2$             |
| score 3                   | 2501-3500 $\mu\text{m}^2$             |
| score 4                   | 3501-5000 $\mu\text{m}^2$             |
| score 5                   | >5000 $\mu\text{m}^2$                 |

**Proliferation of lymphatic vessels into colon lamina propria (0 or 1)**

| <b>Measurement method</b> | <b>Visual inspection (blinded toward the mouse ID) of paraffin sections stained for LYVE1</b> |
|---------------------------|-----------------------------------------------------------------------------------------------|
| score 0                   | absence of LYVE-1 positive vessels beyond basis of colon crypts (Figure S7A)                  |
| score 1                   | presence of LYVE-1 positive vessels in lamina propria between the colon crypts (Figure S7B)   |

**Total score for lymphatic vascular changes in colon wall area (0-16)**



**Supplementary table S2. Recombination map positions of 110 microsatellite markers used for the genotyping of *Il10*<sup>-/-</sup> F2 mice.** CentiMorgan (cM) positions are reported based on The Jackson Laboratory's online Mouse Genome Informatics (MGI 4.2) resource (<http://www.informatics.jax.org>).

| Microsatellite marker | Chromosome | MGI recombinant map position (cM) | Microsatellite marker | Chromosome | MGI recombinant map position (cM) |
|-----------------------|------------|-----------------------------------|-----------------------|------------|-----------------------------------|
| D1Mit156              | 1          | 32.8                              | D11Mit140             | 11         | 28.0                              |
| D1Mit7                | 1          | 41                                | D11Mit36              | 11         | 47.6                              |
| D1Mit386              | 1          | 59.5                              | D11Mit70              | 11         | 54.0                              |
| D1Mit100              | 1          | 71.5                              | D11Mit99              | 11         | 59.5                              |
| D2Mit237              | 2          | 28                                | D11Mit58              | 11         | 65.0                              |
| D2Mit94               | 2          | 47                                | D11Mit48              | 11         | 77.0                              |
| D2Mit62               | 2          | 65                                | D12Mit5               | 12         | 37.0                              |
| D2Mit282              | 2          | 83                                | D12Mit214             | 12         | 38.0                              |
| D2Mit266              | 2          | 109                               | D12Mit19              | 12         | 58.0                              |
| D3Mit131              | 3          | 4.6                               | D12Nds2               | 12         | 59.0                              |
| D3Mit203              | 3          | 11.2                              | D13Mit115             | 13         | 11.0                              |
| D3Mit212              | 3          | 39.7                              | D13Mit179             | 13         | 30.0                              |
| D3Mit189              | 3          | 49.7                              | D13Mit11              | 13         | 40.0                              |
| D3Mit348              | 3          | 61.8                              | D13Mit191             | 13         | 45.0                              |
| D3Mit19               | 3          | 87.6                              | D13Mit130             | 13         | 61.0                              |
| D4Mit108              | 4          | 12.1                              | D13Mit260             | 13         | 65.0                              |
| D4Mit178              | 4          | 35.5                              | D13Mit35              | 13         | 75.0                              |
| D4Mit187              | 4          | 49.6                              | D14Mit11              | 14         | 0.7                               |
| D4Mit226              | 4          | 78.5                              | D14Mit44              | 14         | 10.0                              |
| D5Mit146              | 5          | 1                                 | D14Mit141             | 14         | 15.0                              |
| D5Mit148              | 5          | 18                                | D14Mit203             | 14         | 28.3                              |
| D5Mit205              | 5          | 45                                | D14Mit193             | 14         | 40.0                              |
| D5Mit188              | 5          | 64                                | D14Mit165             | 14         | 52.0                              |
| D5Mit216              | 5          | 72                                | D15Mit179             | 15         | 10.8                              |
| D5Mit223              | 5          | 84                                | D15Mit138             | 15         | 15.4                              |
| D6Mit74               | 6          | 20.5                              | D15Mit63              | 15         | 29.2                              |
| D6Mit230              | 6          | 43                                | D15Mit105             | 15         | 47.9                              |
| D6Mit15               | 6          | 74                                | D15Mit171             | 15         | 54.5                              |
| D7Mit152              | 7          | 1                                 | D15Mit44              | 15         | 59.8                              |
| D7Mit247              | 7          | 16                                | D16Mit154             | 16         | 3.4                               |
| D7Mit213              | 7          | 36.9                              | D16Mit131             | 16         | 4.3                               |
| D7Mit250              | 7          | 37                                | D16Mit4               | 16         | 27.3                              |
| D7Mit253              | 7          | 52.8                              | D16Mit139             | 16         | 43.1                              |
| D7Mit71               | 7          | 65.2                              | D16Mit153             | 16         | 56.8                              |
| D7Mit332              | 7          | 65.6                              | D16Mit71              | 16         | 70.7                              |
| D7Mit259              | 7          | 72                                | D17Mit30              | 17         | 13.6                              |
| D8Mit94               | 8          | 13                                | D17Mit34              | 17         | 18.8                              |
| D8Mit191              | 8          | 21                                | D17Nds3               | 17         | 19.1                              |
| D8Mit178              | 8          | 33                                | D17Mit49              | 17         | 23.2                              |
| D8Mit112              | 8          | 53                                | D17Mit76              | 17         | 29.5                              |
| D8Mit93               | 8          | 72                                | D17Mit88              | 17         | 54.6                              |
| D9Mit206              | 9          | 20                                | D18Mit119             | 18         | 16.0                              |
| D9Mit207              | 9          | 33                                | D18Mit124             | 18         | 32.0                              |
| D9Mit48               | 9          | 34                                | D18Mit7               | 18         | 50.0                              |
| D9Mit12               | 9          | 55                                | D19Mit32              | 19         | 0.0                               |
| D9Mit214              | 9          | 62                                | D19Mit40              | 19         | 25.0                              |
| D9Mit18               | 9          | 71                                | D19Mit12              | 19         | 26.0                              |
| D10Mit123             | 10         | 4                                 | D19Mit1               | 19         | 52.0                              |
| D10Mit42              | 10         | 44                                | D19Mit71              | 19         | 54.0                              |
| D10Mit117             | 10         | 48                                | D19Mit6               | 19         | 55.0                              |
| D10Mit180             | 10         | 64                                | DXMit124              | X          | 2.8                               |
| D10Mit103             | 10         | 69.9                              | DXMit140              | X          | 19.0                              |
| D10Mit271             | 10         | 70                                | DXMit149              | X          | 50.0                              |
| D11Mit149             | 11         | 1                                 | DXMit79               | X          | 50.5                              |
| D11Mit236             | 11         | 20                                | DXMit135              | X          | 69.0                              |

**Supplementary table S3. 18 SNP markers integrated into the genetic map of Chromosome 3.** Physical map (UniSTS annotation of NCBI Mouse Build 37.1) and genetic map (MGI, <http://www.informatics.jax.org> ) were used to estimate the genetic map order of microsatellite markers and SNP markers on Chromosome 3.

| <b>Chromosome 3 marker</b> | <b>NCBI Mouse Build 37.1 physical map position (bp)</b> | <b>MGI recombinant map position</b> | <b>Estimated recombinant map position (cM)</b> |
|----------------------------|---------------------------------------------------------|-------------------------------------|------------------------------------------------|
| D3Mit131                   | 17,462,555                                              | 4.6                                 |                                                |
| D3Mit203                   | 26,835,026                                              | 11.2                                |                                                |
| D3Mit212                   | 83,121,332                                              | 39.7                                |                                                |
| rs13459185                 | 95,750,438                                              |                                     | 47.9                                           |
| rs13477275                 | 96,140,787                                              |                                     | 48.1                                           |
| rs3163371                  | 100,194,280                                             |                                     | 49.6                                           |
| D3Mit189                   | 100,779,519                                             | 49.7                                |                                                |
| rs3720779                  | 101,887,627                                             |                                     | 50                                             |
| rs4140272                  | 104,765,253                                             |                                     | 51.4                                           |
| rs13477315                 | 106,767,998                                             |                                     | 53.4                                           |
| rs13477318                 | 107,918,926                                             |                                     | 54                                             |
| rs13477320                 | 108,822,024                                             |                                     | 54.4                                           |
| rs3712218                  | 109,572,245                                             |                                     | 54.8                                           |
| rs3687751                  | 112,470,201                                             |                                     | 56.2                                           |
| rs3716905                  | 113,497,135                                             |                                     | 56.7                                           |
| rs3022965                  | 113,722,327                                             |                                     | 56.9                                           |
| rs4224164                  | 114,844,526                                             |                                     | 57.4                                           |
| rs3687177                  | 116,662,804                                             |                                     | 58.3                                           |
| rs3720182                  | 120,471,745                                             |                                     | 60.2                                           |
| rs4224200                  | 123,406,475                                             |                                     | 61                                             |
| rs3677929                  | 125,568,747                                             |                                     | 61.5                                           |
| D3Mit348                   | 126,684,318                                             | 61.8                                | 61.7                                           |
| D3Mit19                    | 157,882,544                                             | 87.6                                |                                                |

**Supplementary table S4. Results of the low density qPCR array.** Genes from the Chromosome 3 QTL interval (approximately 107-128 Mb), endogenous control genes, endothelial and inflammation marker genes are shown with fold change of basal level expression in C3Bir-*III0*<sup>-/-</sup> compared to B6-*III0*<sup>-/-</sup> mice and Benjamini-Hochberg-corrected p-values.

| TaqMan Assay ID | Gene symbol   | Fold change | Corrected p-value | TaqMan Assay ID                  | Gene symbol   | Fold change | Corrected p-value |
|-----------------|---------------|-------------|-------------------|----------------------------------|---------------|-------------|-------------------|
| Mm00497922_m1   | Ptbp2         | 1.302       | 2.31E-01          | Mm00438855_m1                    | F3            | 1.028       | 9.24E-01          |
| Mm00499266_m1   | Camk2d        | 1.063       | 7.12E-01          | Mm00833923_m1                    | Gstm3         | 0.799       | 4.50E-01          |
| Mm00804345_m1   | Lrrc39        | 1.368       | 7.12E-01          | Mm00803379_m1                    | Sars          | 1.166       | 4.90E-01          |
| Mm00619360_m1   | Wdr47         | 1.4         | 1.56E-01          | Mm00805036_m1                    | Arhgap29      | 1.685       | 2.31E-01          |
| Mm01324391_m1   | Pde5a         | 1.172       | 4.90E-01          | Mm00660400_m1                    | Prpf38b       | 0.969       | 8.86E-01          |
| Mm00485999_m1   | Frrs1         | 4.076       | 3.04E-04          | Mm00725711_s1                    | Gstm2         | 0.664       | 5.16E-02          |
| Mm00458239_m1   | Slc30a7       | 1.213       | 2.72E-01          | Mm00520420_m1                    | Slc44a3       | 1.009       | 9.52E-01          |
| Mm00463714_m1   | 6330569M22Rik | 1.446       | 7.65E-02          | Mm00512842_m1                    | Gpsm2         | 0.88        | 4.59E-01          |
| Mm00441607_m1   | Stxbp3a       | 1.43        | 8.51E-02          | Mm00492004_m1                    | Abca4         | 2.694       | 5.65E-01          |
| Mm00453178_m1   | Ndst3         | 1.525       | 1.56E-01          | Mm00492394_m1                    | Gnat2         | 0.744       | 2.72E-01          |
| Mm00449197_m1   | Vcam1         | 1.746       | 2.39E-02          | Mm00501651_m1                    | Dbt           | 1.084       | 7.16E-01          |
| Mm00468642_m1   | Hiat1         | 1.147       | 4.59E-01          | Mm00461101_m1                    | Ahcy1         | 0.879       | 4.59E-01          |
| Mm00435975_m1   | Prss12        | 2.206       | 8.95E-02          | Mm00468111_m1                    | Dpyd          | 1.142       | 5.51E-01          |
| Mm00445066_m1   | Vav3          | 1.317       | 3.21E-01          | Mm00470263_m1                    | Alg14         | 0.817       | 4.59E-01          |
| Mm00432688_m1   | Csf1          | 1.44        | 2.72E-01          | Mm00464291_m1                    | Dnntp2        | 0.902       | 5.58E-01          |
| Mm00483387_m1   | Col11a1       | 1.037       | 9.01E-01          | Mm00457515_m1                    | Celsr2        | 0.903       | 6.18E-01          |
| Mm00613500_m1   | Atxn7l2       | 1.384       | 2.69E-01          | Mm00600213_m1                    | Bcar3         | 1.21        | 3.21E-01          |
| Mm00724102_m1   | D3Bwg0562e    | 1.176       | 5.58E-01          | Mm00622139_m1                    | Fncd7         | 1.433       | 2.04E-01          |
| Mm00525200_s1   | Tram1l1       | 1.492       | 2.69E-01          | Mm00651524_m1                    | Amy1          | 0.263       | 4.59E-01          |
| Mm00508416_m1   | Rtcd1         | 1.01        | 9.52E-01          | Mm00523288_m1                    | Slc35a3       | 0.849       | 2.99E-01          |
| Mm00453144_m1   | Ntng1         | 0.968       | 9.01E-01          | Mm00495930_m1                    | Ugt8a         | 1.118       | 8.11E-01          |
| Mm00431779_m1   | Aix3          | 2.61        | 5.14E-01          | Mm00514644_m1                    | Edg1          | 1.159       | 6.41E-01          |
| Mm00436150_m1   | Abcd3         | 0.798       | 3.21E-01          | Mm00490905_m1                    | Sort1         | 1.275       | 2.04E-01          |
| Mm00498358_m1   | Psrc1         | 1.207       | 4.95E-01          | Mm00519404_m1                    | Eps8l3        | 1.025       | 9.01E-01          |
| Mm00499573_g1   | Gstm7         | 0.85        | 4.90E-01          | Mm00469639_m1                    | Myoz2         | 1.347       | 4.90E-01          |
| Mm00510216_m1   | Dph5          | 0.856       | 4.59E-01          | Mm00485005_m1                    | Sypl2         | 1.625       | 8.95E-02          |
| Mm00833915_g1   | Gstm1         | 0.598       | 2.39E-02          | Mm02342486_mH                    | Amy2          | 0.455       | 6.41E-01          |
| Mm00652377_m1   | Palmd         | 1.078       | 9.00E-01          | Mm00458851_m1                    | Rnpc3         | 1.153       | 4.90E-01          |
| Mm00515890_m1   | Gstm5         | 1.472       | 1.56E-01          | Mm00619261_m1                    | Tmem56        | 0.857       | 3.86E-01          |
| Mm00558495_s1   | Gpr61         | 1.072       | 8.06E-01          | Mm00625784_m1                    | 4921525H12Rik | 1.693       | 3.21E-01          |
| Mm00783337_s1   | Cnn3          | 1.089       | 6.41E-01          | Mm00728197_s1                    | Gstm4         | 0.848       | 2.72E-01          |
| Mm00659237_m1   | 4921515J06Rik | 1.234       | 5.58E-01          | Mm00660744_m1                    | Sec24d        | 1.23        | 5.14E-01          |
| Mm00656783_gH   | Gstm6         | 0.733       | 1.13E-01          | Mm00514996_m1                    | Gclm          | 0.949       | 8.80E-01          |
| Mm00848037_g1   | Taf13         | 1.101       | 6.41E-01          | Mm00509247_m1                    | 2010200O16Rik | 1.228       | 2.72E-01          |
| Mm00554503_m1   | Slc25a24      | 0.996       | 9.84E-01          | Mm00517707_m1                    | Gpr88         | 3.035       | 2.35E-02          |
| Mm00618325_m1   | Ank2          | 1.296       | 3.21E-01          | Mm00508295_m1                    | 1810037117Rik | 0.879       | 4.90E-01          |
| Mm00557970_m1   | Arsj          | 2.617       | 6.49E-02          | Mm00480767_m1                    | Ndst4         | 0.924       | 7.76E-01          |
| Mm00523781_m1   | Cicc1         | 1.196       | 3.21E-01          | Mm00433188_m1                    | Fabp2         | 0.461       | 1.98E-01          |
| Mm00481738_g1   | 2510027J23Rik | 4.178       | 8.51E-02          | <b>Endogenous control assays</b> |               |             |                   |
| Mm00469621_m1   | Extl2         | 1.129       | 5.65E-01          | Mm02342429_g1                    | Ppia          |             |                   |
| Mm00462236_m1   | Fnbp1l        | 1.121       | 4.90E-01          | Mm00801778_m1                    | Ifng          |             |                   |
| Mm00476778_m1   | Usp53         | 1.034       | 9.01E-01          | Mm01246167_m1                    | Pecam1        |             |                   |
| Mm00462529_m1   | Olfm3         | 0.626       | 2.69E-01          | Mm01222419_m1                    | Kdr           |             |                   |
| Mm00621458_g1   | A730020M07Rik | 1.309       | 6.41E-01          | Mm00486938_m1                    | Cdh5          |             |                   |
| Mm00491977_s1   | Synpo2        | 1.298       | 4.90E-01          | Mm99999915_g1                    | Gapdh         |             |                   |
| Mm00802671_m1   | Gnai3         | 1.002       | 9.87E-01          | Mm00607939_s1                    | Actb          |             |                   |
| Mm00512072_m1   | Ampd2         | 0.99        | 9.52E-01          | Mm00435617_m1                    | Pgk1          |             |                   |
| Mm00619134_m1   | Prmt6         | 0.932       | 6.41E-01          | Hs99999901_s1                    | 18S rRNA      |             |                   |
| Mm00525196_m1   | Amigo1        | 0.899       | 7.12E-01          |                                  |               |             |                   |
